# Supplementary material
Source: HighWire-hosted journal article supplement (https://bjo.bmj.com/highwire/filestream/234311/field_highwire_adjunct_files/0/bjo-2022-321577supp001_data_supplement.pdf)

**Figure S1. Conceptual framework on the association between vision impairment and mortality**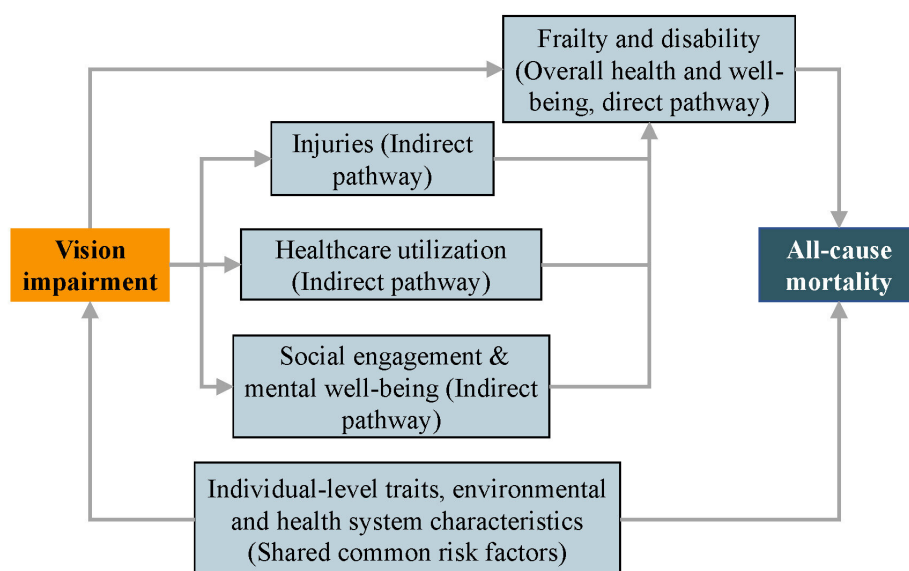

Supplement: bjo-2022-321577supp001_data_supplement.pdf [file bjo-2022-321577supp001_data_supplement.pdf]
